# Supplementary material
Source: PubMed Central journal article supplement (PMC4056947)
Supplement: ml300105s_si_001.pdf [file ml300105s_si_001.pdf]

## Supporting Information

### Chemical Diversity of Metabolites from Fungi, Cyanobacteria, and Plants Relative to FDA-Approved Anticancer Agents

Tamam El-Elimat, Xiaoli Zhang, David Jarjoura, Franklin J. Moy, Jimmy Orjala,  
A. Douglas Kinghorn, Cedric J. Pearce, and Nicholas H. Oberlies

#### Contents:

#### Experimental Procedures

**Table S1.** Molecular Descriptors Utilized in the Current Study Compared to Related PCA Studies in the Literature.

**Table S2.** Pearson Correlation Coefficients for Raw Data.

**Table S3.** Pearson Correlation Coefficients for Molecular Weight Standardized Data.

**Table S4.** Summary Statistics of Different Properties among Secondary Metabolites from Filamentous Fungi ( $n = 105$ ), Cyanobacteria ( $n = 75$ ), Tropical Plants ( $n = 163$ ) and Anticancer Drugs ( $n = 96$ ).

**Figure S1.** Plot of the first and fourth principal components of the isolated secondary metabolites from filamentous fungi ( $n = 105$ ), cyanobacteria ( $n = 75$ ), tropical plants ( $n = 163$ ) and anticancer drugs ( $n = 96$ ).

**Figure S1.** Chemical structures of the anticancer drugs that were not overlapping in the chemical space with the investigated compounds in the PCA plots in Figures 1, 2, and S1.

## **EXPERIMENTAL PROCEDURES**

The natural products utilized in this study were isolated in pursuit of anticancer leads. The recent literature may be examined for examples of descriptions of the isolation and structure elucidation of compounds from filamentous fungi, cyanobacteria, and tropical plants by our collaborative team. The FDA-approved anticancer agents were selected from two complementary sources: those posted on the website of the Developmental Therapeutic Program NCI/NIH and the recently approved anticancer drugs from the orange book on the FDA website. All molecular descriptors, except number of chiral centers, were calculated using Dragon software for molecular descriptor calculation (version 6.0 – 2010; Talete srl, Milano, Italy). The number of chiral centers was tabulated by inspection. SAS was used for principal component analysis varimax rotation of the 9 variable correlation matrix (Proc Princomp and Factor). Components score were obtained after variance standardization.

**Table S1.** Molecular Descriptors Utilized in the Current Study Compared to Related PCA Studies in the Literature<sup>14-17</sup>

| Molecular descriptors                                                          | Feher and Schmidt <sup>14</sup> | Singh et al. <sup>16</sup> | Tan <sup>15</sup> | Singh and Culberson <sup>17</sup> | Current study |
|--------------------------------------------------------------------------------|---------------------------------|----------------------------|-------------------|-----------------------------------|---------------|
| molecular weight (MW)                                                          | ---                             | ×                          | ×                 | ×                                 | ×             |
| number of chiral centers (nCC)                                                 | ×                               | ---                        | ×                 | ×                                 | ×             |
| number of rotatable bonds (NRBN)                                               | ×                               | ×                          | ×                 | ×                                 | ×             |
| number of solvated acceptor atoms for H-bonds (N,O,F) [N <sub>Acc,solv</sub> ] | ×                               | ×                          | ×                 | ×                                 | ×             |
| number of solvated donor atoms for H-bonds (N and O) [N <sub>Don,solv</sub> ]  | ×                               | ×                          | ×                 | ---                               | ×             |
| topological polar surface area [TPSA(NO)]                                      | ---                             | ×                          | ×                 | ×                                 | ×             |
| octanol/water partition coefficient                                            | ---                             | ×                          | ×                 | ×                                 | ×             |
| number of nitrogen atoms (nN)                                                  | ---                             | ---                        | ×                 | ×                                 | ×             |
| number of oxygen atoms (nO)                                                    | ---                             | ---                        | ×                 | ×                                 | ×             |
| number of C-N bonds (nCN)                                                      | ×                               | ---                        | ---               | ---                               | ---           |
| number of C-O bonds (nCO)                                                      | ×                               | ---                        | ---               | ---                               | ---           |
| number of C-halogen bonds (nCX)                                                | ×                               | ---                        | ---               | ---                               | ---           |
| number of C-S bonds (nCS)                                                      | ×                               | ---                        | ---               | ---                               | ---           |
| ratio of aromatic atoms to ring atoms                                          | ×                               | ---                        | ---               | ---                               | ---           |
| ring fusion degree                                                             | ×                               | ---                        | ---               | ---                               | ---           |
| normalized bond flexibility                                                    | ---                             | ---                        | ---               | ×                                 | ---           |

**Table S2.** Pearson Correlation Coefficients for Raw Data

| <b>Correlation coefficient</b> | <b>MW</b> | <b>nRBN</b> | <b>nN</b> | <b>nO</b> | <b>nH<sub>Don</sub></b> | <b>nH<sub>Acc</sub></b> | <b>TPSA</b> | <b>MLOGP</b> | <b>nCC</b> |
|--------------------------------|-----------|-------------|-----------|-----------|-------------------------|-------------------------|-------------|--------------|------------|
| MW                             | 1.0000    | 0.8713      | 0.8185    | 0.8878    | 0.9001                  | 0.9466                  | 0.9459      | -0.6667      | 0.6500     |
| nRBN                           | 0.8713    | 1.0000      | 0.8174    | 0.7533    | 0.8493                  | 0.8681                  | 0.8702      | -0.6292      | 0.4024     |
| nN                             | 0.8185    | 0.8174      | 1.0000    | 0.6271    | 0.8768                  | 0.8777                  | 0.8795      | -0.7712      | 0.3450     |
| nO                             | 0.8878    | 0.7533      | 0.6271    | 1.0000    | 0.8061                  | 0.9202                  | 0.9097      | -0.7564      | 0.6632     |
| nH <sub>Don</sub>              | 0.9001    | 0.8493      | 0.8768    | 0.8061    | 1.0000                  | 0.9258                  | 0.9607      | -0.7850      | 0.4993     |
| nH <sub>Acc</sub>              | 0.9466    | 0.8681      | 0.8777    | 0.9202    | 0.9258                  | 1.0000                  | 0.9906      | -0.8427      | 0.5682     |
| TPSA                           | 0.9459    | 0.8702      | 0.8795    | 0.9097    | 0.9607                  | 0.9906                  | 1.0000      | -0.8373      | 0.5591     |
| MLOGP                          | -0.6667   | -0.6292     | -0.7712   | -0.7564   | -0.7850                 | -0.8427                 | -0.8373     | 1.0000       | -0.3916    |
| nCC                            | 0.6500    | 0.4024      | 0.3450    | 0.6632    | 0.4993                  | 0.5682                  | 0.5591      | -0.3916      | 1.0000     |

**Table S3.** Pearson Correlation Coefficients for Molecular Weight Standardized Data

| <b>Correlation coefficient</b> | <b>MW</b> | <b>nRBN</b> | <b>nN</b> | <b>nO</b> | <b>nH<sub>Don</sub></b> | <b>nH<sub>Acc</sub></b> | <b>TPSA</b> | <b>MLOGP</b> | <b>nCC</b> |
|--------------------------------|-----------|-------------|-----------|-----------|-------------------------|-------------------------|-------------|--------------|------------|
| MW                             | 1.0000    | 0.2423      | 0.1755    | 0.0879    | 0.2571                  | 0.2449                  | 0.2201      | -0.4706      | 0.1445     |
| nRBN                           | 0.2423    | 1.0000      | -0.0071   | 0.0249    | 0.0669                  | 0.0604                  | 0.0296      | 0.0694       | -0.2509    |
| nN                             | 0.1755    | -0.0071     | 1.0000    | -0.3057   | 0.4915                  | 0.4680                  | 0.4842      | -0.3778      | -0.2184    |
| nO                             | 0.0879    | 0.0249      | -0.3057   | 1.0000    | 0.2136                  | 0.6711                  | 0.6170      | -0.5665      | 0.0529     |
| nH <sub>Don</sub>              | 0.2571    | 0.0669      | 0.4915    | 0.2136    | 1.0000                  | 0.5692                  | 0.7763      | -0.5713      | -0.1417    |
| nH <sub>Acc</sub>              | 0.2449    | 0.0604      | 0.4680    | 0.6711    | 0.5692                  | 1.0000                  | 0.9172      | -0.8048      | -0.1255    |
| TPSA                           | 0.2201    | 0.0296      | 0.4842    | 0.6170    | 0.7763                  | 0.9172                  | 1.0000      | -0.7766      | -0.1471    |
| MLOGP                          | -0.4706   | 0.0694      | -0.3778   | -0.5665   | -0.5713                 | -0.8048                 | -0.7766     | 1.0000       | -0.0515    |
| nCC                            | 0.1445    | -0.2509     | -0.2184   | 0.0529    | -0.1417                 | -0.1255                 | -0.1471     | -0.0515      | 1.0000     |

**Table S4.** Summary statistics of different properties among secondary metabolites from filamentous fungi ( $n = 105$ ), cyanobacteria ( $n = 75$ ), tropical plants ( $n = 163$ ) and anticancer drugs ( $n = 96$ )

| source                                    | Variables | Raw data |           | After MW standardization |           |
|-------------------------------------------|-----------|----------|-----------|--------------------------|-----------|
|                                           |           | Mean     | Std. Dev. | Mean                     | Std. Dev. |
| <b>Anticancer Drugs</b><br>( $n = 96$ )   | MW        | 412.76   | 248.04    | 1.000                    | 0.000     |
|                                           | RBN       | 5.31     | 5.12      | 0.012                    | 0.008     |
|                                           | nN        | 3.02     | 2.79      | 0.009                    | 0.008     |
|                                           | nO        | 4.92     | 4.73      | 0.011                    | 0.007     |
|                                           | nHDon     | 3.09     | 3.46      | 0.008                    | 0.008     |
|                                           | nHAcc     | 8.00     | 5.69      | 0.020                    | 0.009     |
|                                           | TPSA      | 113.88   | 89.62     | 0.295                    | 0.164     |
|                                           | MLOGP     | 1.12     | 2.24      | 0.003                    | 0.007     |
|                                           | CC        | 3.30     | 4.87      | 0.006                    | 0.007     |
| <b>Cyanobacteria</b><br>( $n = 75$ )      | MW        | 628.78   | 338.39    | 1.000                    | 0.000     |
|                                           | RBN       | 7.77     | 7.35      | 0.011                    | 0.007     |
|                                           | nN        | 3.79     | 4.44      | 0.005                    | 0.004     |
|                                           | nO        | 6.01     | 6.10      | 0.007                    | 0.005     |
|                                           | nHDon     | 5.12     | 5.27      | 0.007                    | 0.004     |
|                                           | nHAcc     | 9.12     | 10.49     | 0.011                    | 0.008     |
|                                           | TPSA      | 150.41   | 152.65    | 0.193                    | 0.106     |
|                                           | MLOGP     | 2.30     | 3.55      | 0.006                    | 0.006     |
|                                           | CC        | 6.28     | 4.31      | 0.010                    | 0.004     |
| <b>Filamentous Fungi</b><br>( $n = 105$ ) | MW        | 660.36   | 555.30    | 1.000                    | 0.000     |
|                                           | RBN       | 12.14    | 17.60     | 0.014                    | 0.012     |
|                                           | nN        | 4.19     | 7.72      | 0.003                    | 0.004     |
|                                           | nO        | 8.98     | 6.87      | 0.014                    | 0.004     |
|                                           | nHDon     | 5.74     | 8.11      | 0.007                    | 0.004     |
|                                           | nHAcc     | 13.17    | 14.29     | 0.018                    | 0.004     |
|                                           | TPSA      | 196.95   | 218.11    | 0.263                    | 0.073     |
|                                           | MLOGP     | 0.53     | 3.65      | 0.004                    | 0.005     |
|                                           | CC        | 5.69     | 3.92      | 0.010                    | 0.006     |
| <b>Tropical Plants</b><br>( $n = 163$ )   | MW        | 450.42   | 152.31    | 1.000                    | 0.000     |
|                                           | RBN       | 5.90     | 4.25      | 0.014                    | 0.011     |
|                                           | nN        | 0.06     | 0.27      | 0.000                    | 0.001     |
|                                           | nO        | 6.57     | 3.68      | 0.014                    | 0.005     |
|                                           | nHDon     | 2.37     | 2.10      | 0.005                    | 0.003     |
|                                           | nHAcc     | 6.60     | 3.65      | 0.014                    | 0.005     |
|                                           | TPSA      | 100.87   | 52.82     | 0.220                    | 0.064     |
|                                           | MLOGP     | 2.70     | 1.84      | 0.007                    | 0.004     |
|                                           | CC        | 4.58     | 5.46      | 0.009                    | 0.008     |

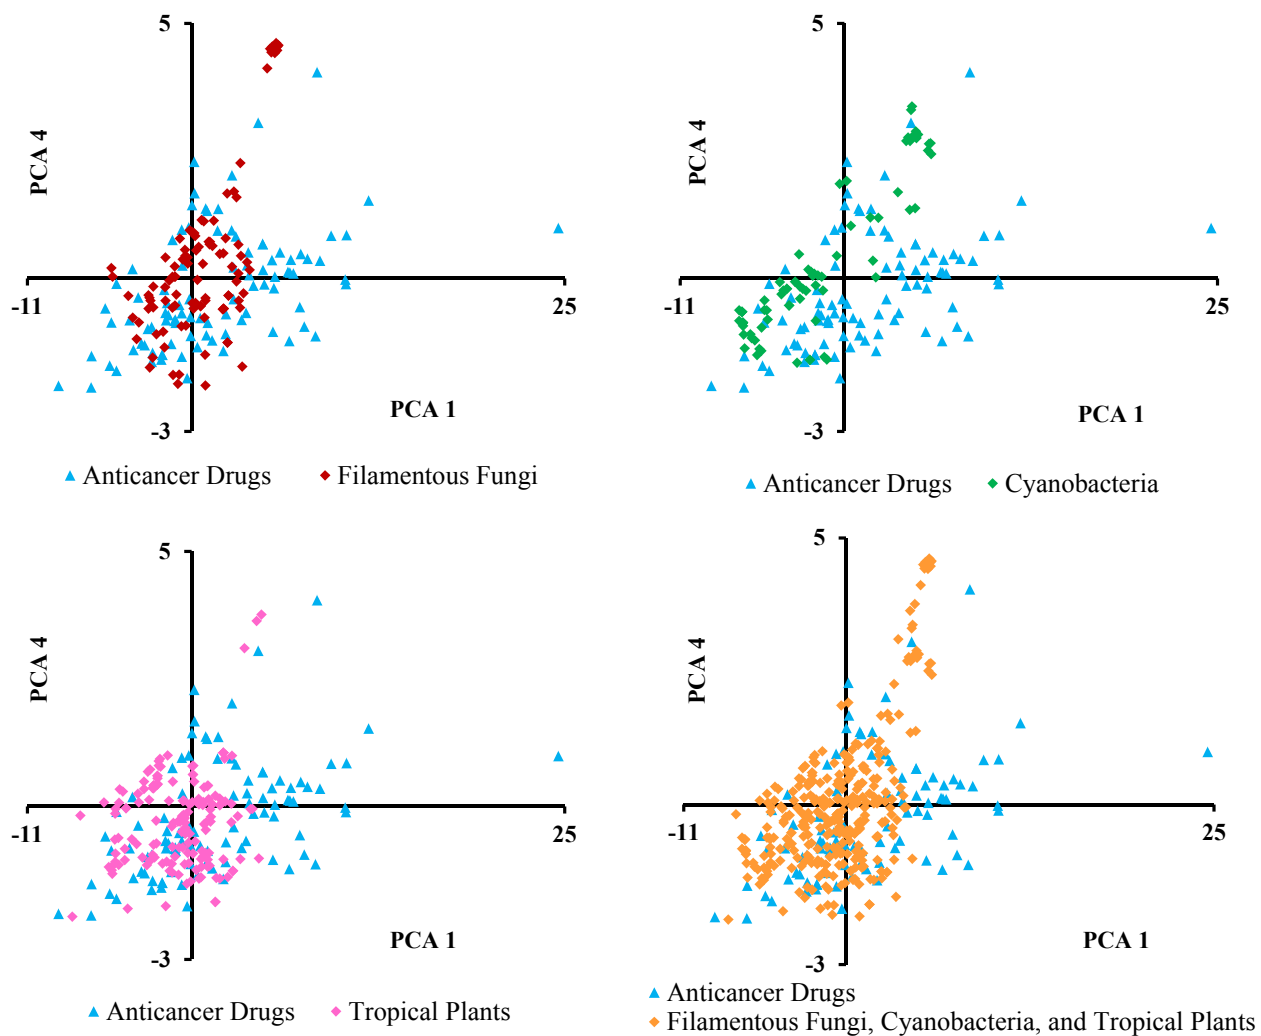

**Figure S1.** Plot of the first and fourth principal components of the isolated secondary metabolites from filamentous fungi ( $n = 105$ ), cyanobacteria ( $n = 75$ ), tropical plants ( $n = 163$ ) and anticancer drugs ( $n = 96$ ).

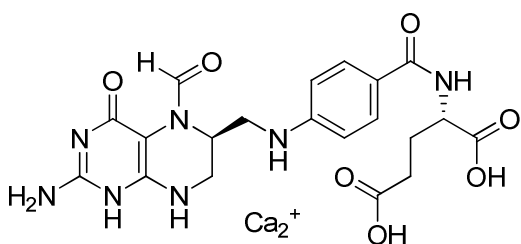

**Leucovorin calcium**

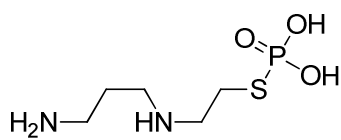

**Amifostine**

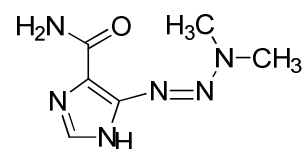

**Dacarbazine**

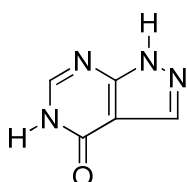

**Allopurinol**

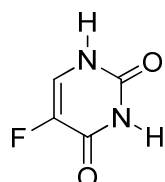

**Fluorouracil**

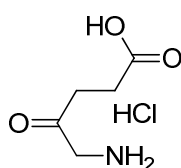

**Aminolevulinic acid**

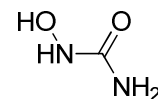

**Hydroxyurea**

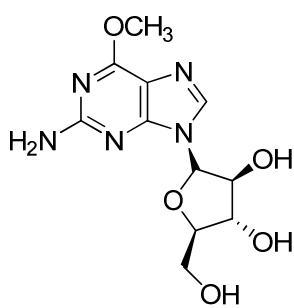

**Nelarabine**

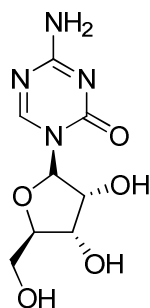

**Azacitidine**

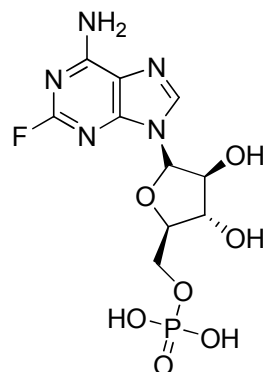

**Fludarabine phosphate**

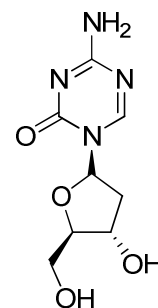

**Decitabine**

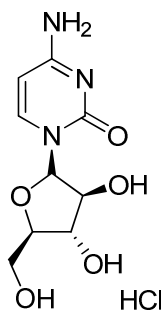

**Cytarabine hydrochloride**

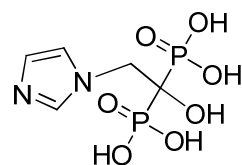

**Zoledronic acid**

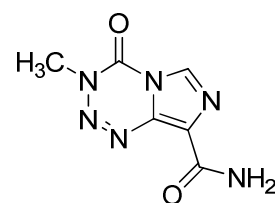

**Temozolomide**

**Figure S2.** Chemical structures of the anticancer drugs that were not overlapping in the chemical space with the investigated compounds in the PCA plots in Figures 1, 2, and S1.
